# Supplementary material for: Transcriptomic Establishment of Pig Macrophage Polarization Signatures
Source: MDPI journal article supplement (doi:10.3390/cimb45030151), 2023-03-12
Supplement: s1 [file s1]

## **List of additional files**

**Additional file1. Transcriptomic comparison of porcine macrophage phenotypes, M1 versus M2.** List of all DEGs, enrichment pathways, and hubs identified by transcriptome analysis of M1 versus M2.

**Additional file2. Transcriptomic comparison of porcine macrophage phenotypes, M1\_IFN  $\gamma$  +LPS versus M1\_GM-CSF.** List of all DEGs, enrichment pathways, and hubs identified by transcriptome analysis of M1\_IFN $\gamma$ +LPS versus M1\_GM-CSF.

**Additional file3. Transcriptomic comparison of porcine macrophage phenotypes, M2\_IL4+IL10 versus M2\_M-CSF.** List of all DEGs, enrichment pathways, and hubs identified by transcriptome analysis of M2\_IL4+IL10 versus M2\_M-CSF.

**Additional file4.** List of enrichment pathways identified by GSEA analysis of macrophage cultured *in vitro* vs pathogen-infected using GSEA software.
