# Supplementary material for: Transcriptomic Establishment of Pig Macrophage Polarization Signatures
Source: MDPI journal article supplement (doi:10.3390/cimb45030151), 2023-03-12
Supplement: s1 [file s1]

## **SUPPLEMENTARY MATERIAL- Figs and Tables**

## Supplementary Figs

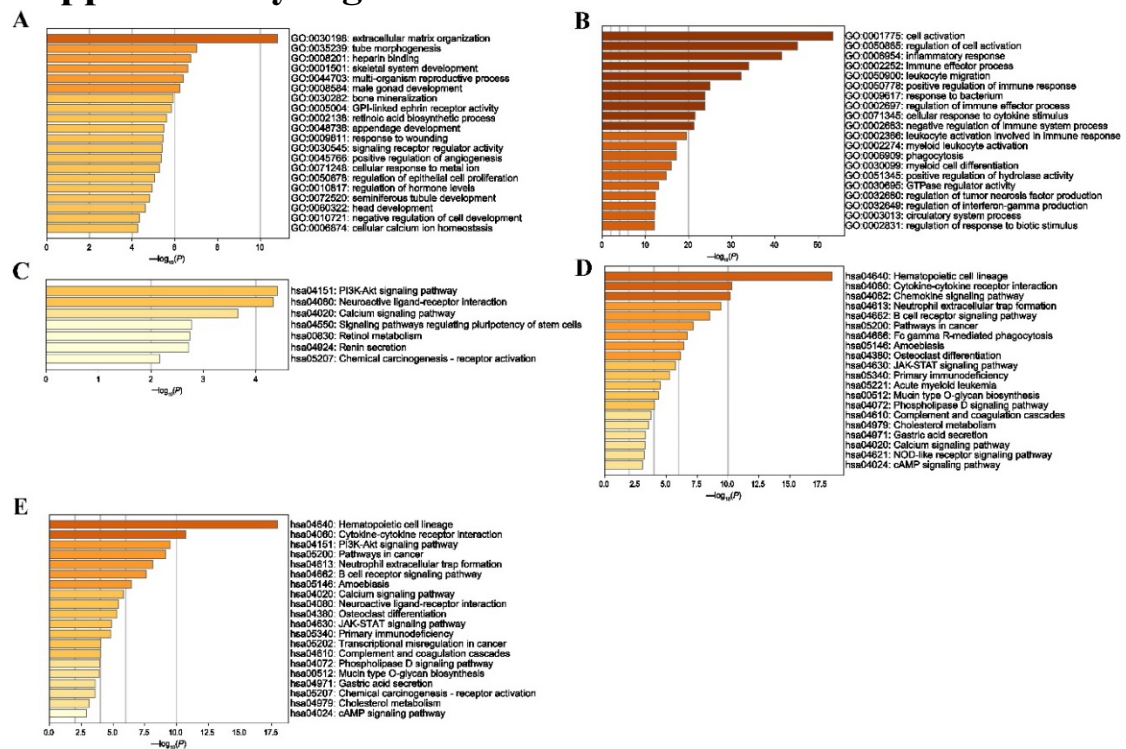

**Supplementary Fig.1** The KEGG or GO Analysis of M1 and M2. (A) Top enriched GO biological processes of up-regulated genes. (B) Top enriched GO biological processes of down-regulated genes. (C) Top enriched KEGG biological processes of up-regulated genes. (D) Top enriched KEGG biological processes of down-regulated genes. (E) Top enriched KEGG biological processes of 730 genes.

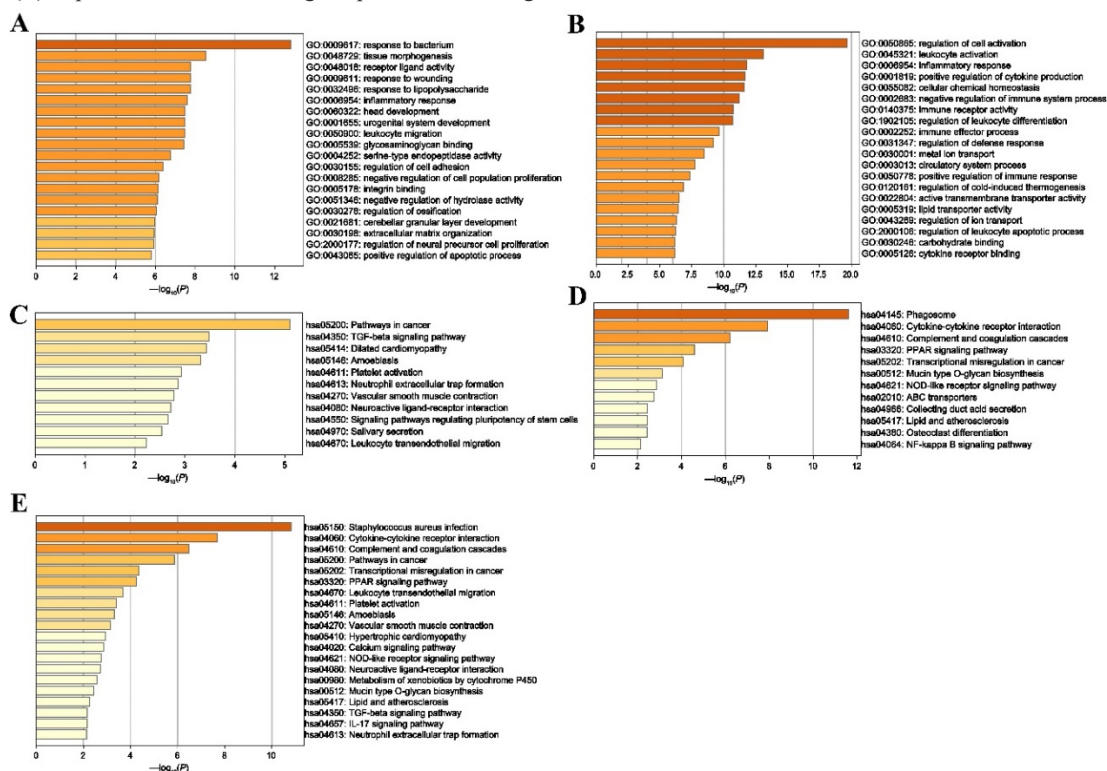

**Supplementary Fig.2** The KEGG or GO Analysis of M1\_IFN  $\gamma$ +LPS and M1\_GM-CSF. (A) Top enriched GO biological processes of up-regulated genes. (B) Top enriched GO biological processes of down-regulated genes. (C) Top enriched KEGG biological processes of up-regulated genes. (D) Top enriched KEGG biological processes of down-regulated genes. (E) Top enriched KEGG biological processes of 730 genes.

Top enriched KEGG biological processes of up-regulated genes. **(D)** Top enriched KEGG biological processes of down-regulated genes. **(E)** Top enriched KEGG biological processes of 598 genes.

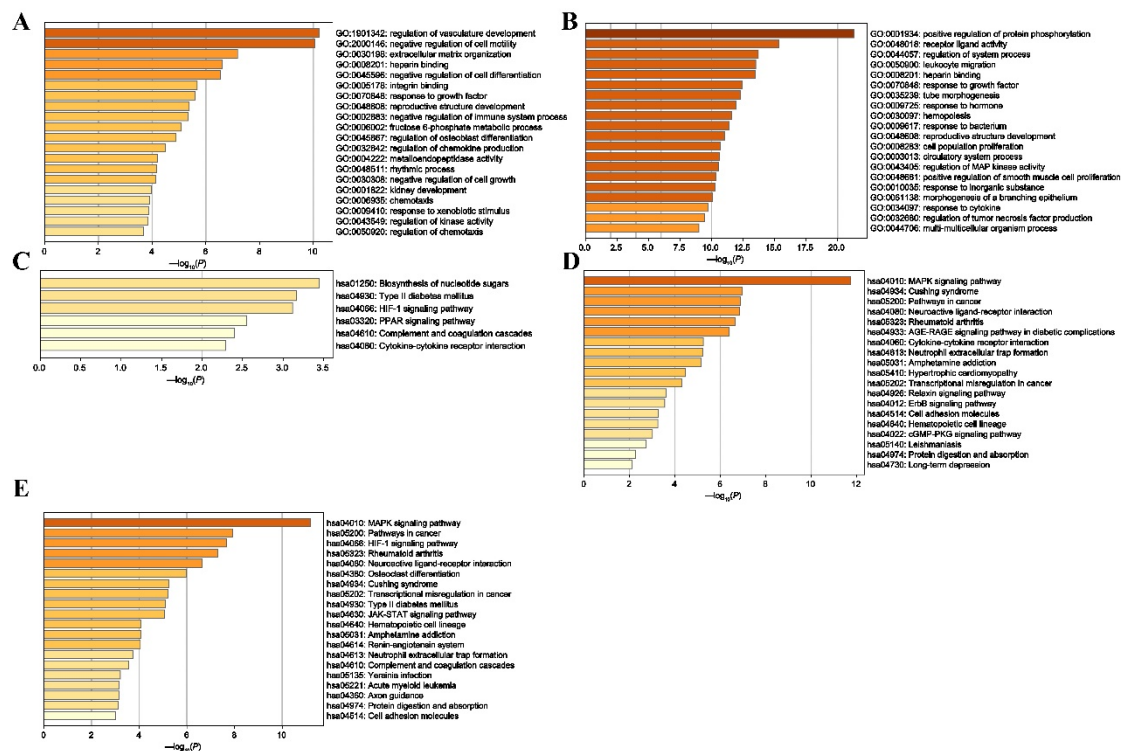

**Supplementary Fig.3 The KEGG or GO Analysis of M2\_IL4+IL10 and M2\_M-CSF. (A)** Top enriched GO biological processes of up-regulated genes. **(B)** Top enriched GO biological processes of down-regulated genes; **(C)** Top enriched KEGG biological processes of up-regulated genes. **(D)** Top enriched KEGG biological processes of down-regulated genes. **(E)** Top enriched KEGG biological processes of 332 genes.

## Supplementary tables

**S1 Table. Data output quality list**

|                        | Raw Reads  | Clean Reads | Raw<br>Base(G) | Clean<br>Base(G) | Effective<br>Rate (%) | Error Rate<br>(%) | Q20(%) | Q30(%) | GC Content<br>(%) |
|------------------------|------------|-------------|----------------|------------------|-----------------------|-------------------|--------|--------|-------------------|
| M1_IFN $\gamma$ +LPS.3 | 55,816,079 | 54,627,974  | 16.74          | 16.39            | 97.87                 | 0.04              | 97.3   | 91.98  | 53.09             |
| M2_M-CSF.2             | 49,465,538 | 48,351,626  | 14.84          | 14.51            | 97.75                 | 0.04              | 97.01  | 91.29  | 53.91             |
| M1_IFN $\gamma$ +LPS.1 | 75,618,946 | 73,922,737  | 22.69          | 22.18            | 97.76                 | 0.04              | 97.23  | 92.13  | 54.19             |
| M2_M-CSF.1             | 51,587,689 | 50,401,680  | 15.48          | 15.12            | 97.7                  | 0.04              | 97.18  | 91.7   | 54.02             |
| M2_M-CSF.4             | 49,014,356 | 48,379,317  | 14.7           | 14.51            | 98.7                  | 0.04              | 96.56  | 90.06  | 53.42             |
| M1_IFN $\gamma$ +LPS.2 | 55,594,140 | 54,880,707  | 16.68          | 16.46            | 98.72                 | 0.04              | 97.17  | 91.65  | 53.43             |
| M1_GM-CSF.3            | 41,956,829 | 41,034,198  | 12.59          | 12.31            | 97.8                  | 0.04              | 96.96  | 91.52  | 53.39             |
| M1_IFN $\gamma$ +LPS.4 | 56,583,524 | 55,406,603  | 16.98          | 16.62            | 97.92                 | 0.04              | 97.38  | 92.24  | 53.66             |
| M2_IL4+IL10.2          | 74,606,423 | 73,282,646  | 22.38          | 21.98            | 98.23                 | 0.04              | 97.08  | 91.41  | 52.97             |
| M1_GM-CSF.4            | 67,209,133 | 65,873,791  | 20.16          | 19.76            | 98.01                 | 0.04              | 97.41  | 92.53  | 52.85             |
| M1_GM-CSF.1            | 53,987,356 | 53,243,421  | 16.2           | 15.97            | 98.62                 | 0.04              | 96.88  | 91.27  | 53.53             |
| M2_IL4+IL10.1          | 61,546,698 | 60,779,788  | 18.46          | 18.23            | 98.75                 | 0.04              | 96.86  | 90.85  | 54.12             |
| M2_IL4+IL10.4          | 67,730,073 | 66,381,289  | 20.32          | 19.91            | 98.01                 | 0.04              | 96.53  | 89.94  | 54.39             |
| M1_GM-CSF.2            | 43,257,600 | 42,648,637  | 12.98          | 12.79            | 98.59                 | 0.04              | 97.22  | 92.06  | 52.02             |

**S2 Table. The observed marker genes of M1 and M2 macrophages**

| Gene   | Cell Marker   | References                                   | Gene    | Cell Marker   | References                               |
|--------|---------------|----------------------------------------------|---------|---------------|------------------------------------------|
| PADI4  | M1 macrophage | (Cheng et al., 2021a)                        | HLA-DRA | M1 macrophage | (Camiolo et al., 2020; Wu et al., 2021b) |
| FCRL3  | M1 macrophage | (Quan et al., 2021)                          | DLL4    | M1 macrophage | (Pagie et al., 2018)                     |
| JAK3   | M1 macrophage | (Quero et al., 2020)                         | IRF5    | M1 macrophage | (Lv et al., 2021; Huang et al., 2022)    |
| CXCR4  | M1 macrophage | (Fang et al., 2021)                          | PTPRO   | M1 macrophage | (Dong et al., 2021)                      |
| IL10RA | M1 macrophage | (Acosta et al., 2019)                        | MFAP4   | M2 macrophage | (Huang et al., 2022)                     |
| TLR8   | M1 macrophage | (Wu et al., 2021b)                           | PTH1R   | M2 macrophage | (Zhang et al., 2021)                     |
| MARCO  | M1 macrophage | (Talamonti et al., 2017; Sato et al., 2018)  | CLDN11  | M2 macrophage | (van den Bossche et al., 2012)           |
| TLR1   | M1 macrophage | (Müller et al., 2017)                        | AGTR1   | M2 macrophage | (Cui et al., 2021)                       |
| TREM1  | M1 macrophage | (Wu et al., 2021a)                           | COL9A3  | M2 macrophage | (Liu et al., 2021)                       |
| CLEC7A | M1 macrophage | (Yan et al., 2021)                           | EEF1A2  | M2 macrophage | (Lv et al., 2021; Tan et al., 2021)      |
| TLR2   | M1 macrophage | (Müller et al., 2017)                        | CRABP2  | M2 macrophage | (Yan et al., 2020)                       |
| CLEC4E | M1 macrophage | (Inoue, 2017)                                | FGFR3   | M2 macrophage | (Huang et al., 2022)                     |
| TRPM2  | M1 macrophage | (Beceiro et al., 2017)                       | PTX3    | M2 macrophage | (Huang et al., 2022)                     |
| S100A8 | M1 macrophage | (LA et al., 2017)                            | CCL11   | M2 macrophage | (Chen et al., 2019)                      |
| SLAMF1 | M1 macrophage | (Al-Rubaie et al., 2018)                     | ALDH1A1 | M2 macrophage | (Oliveira et al., 2010)                  |
| S100A9 | M1 macrophage | (LA et al., 2017)                            | ENHO    | M2 macrophage | (Sato et al., 2018)                      |
| CASP1  | M1 macrophage | (Awad et al., 2017)                          | MATN2   | M2 macrophage | (Wang et al., 2019a)                     |
| IRF8   | M1 macrophage | (Guo et al., 2016)                           | ANGPT2  | M2 macrophage | (Wu et al., 2017)                        |
| CD68   | M1 macrophage | (Shapouri-Moghaddam et al., 2018)            | HMOX1   | M2 macrophage | (Seneviratne et al., 2021)               |
| IL27   | M1 macrophage | (Al-Rubaie et al., 2018; Chiba et al., 2018) | IL1RL1  | M2 macrophage | (Wang et al., 2019b)                     |
| MYO1F  | M1 macrophage | (Song et al., 2021)                          | CYP1A1  | M2 macrophage | (Cui et al., 2020)                       |
| IL7R   | M1 macrophage | (Joerink et al., 2011)                       | CD5L    | M2 macrophage | (Sanjurjo et al., 2018)                  |
| INPP5D | M1 macrophage | (Jablonski et al., 2016)                     | POSTN   | M2 macrophage | (Binnemars-Postma et al., 2018)          |
| CCR7   | M1 macrophage | (Joerink et al., 2011; Cheng et al., 2021b)  | CCN3    | M2 macrophage | (Chen et al., 2014)                      |
| VENTX  | M1 macrophage | (Le et al., 2018)                            |         |               |                                          |

## References

- Acosta, J. R., Tavira, B., Douagi, I., Kulyté, A., Arner, P., Rydén, M., et al. (2019). Human-Specific Function of IL-10 in Adipose Tissue Linked to Insulin Resistance. *J. Clin. Endocrinol. Metab.* 104, 4552–4562. doi: 10.1210/jc.2019-00341.
- Al-Rubaie, A., Wise, A. F., Sozo, F., De Matteo, R., Samuel, C. S., Harding, R., et al. (2018). The therapeutic effect of mesenchymal stem cells on pulmonary myeloid cells following neonatal hyperoxic lung injury in mice. *Respir. Res.* 19, 1–11.
- Awad, F., Assrawi, E., Jumeau, C., Georgin-Lavialle, S., Cobret, L., Duquesnoy, P., et al. (2017). Impact of human monocyte and macrophage polarization on NLR expression and NLRP3 inflammasome activation. *PLoS One* 12, e0175336.
- Beceiro, S., Radin, J. N., Chatuvedi, R., Piazzuelo, M. B., Horvarth, D. J., Cortado, H., et al. (2017). TRPM2 ion channels regulate macrophage polarization and gastric inflammation during *Helicobacter pylori* infection. *Mucosal Immunol.* 10, 493–507. doi: 10.1038/mi.2016.60.
- Binnemars-Postma, K., Bansal, R., Storm, G., and Prakash, J. (2018). Targeting the Stat6 pathway in tumor-associated macrophages reduces tumor growth and metastatic niche formation in breast cancer. *FASEB J.* 32, 969–978. doi: 10.1096/fj.201700629R.
- Camiolo, G., Barbato, A., Giallongo, C., Vicario, N., Romano, A., Parrinello, N. L., et al. (2020). Iron regulates myeloma cell/macrophage interaction and drives resistance to bortezomib. *Redox Biol.* 36, 101611.
- Chen, C., Perry, T. L., Chitko-McKown, C. G., Smith, A. D., Cheung, L., Beshah, E., et al. (2019). The regulatory actions of retinoic acid on M2 polarization of porcine macrophages. *Dev. Comp. Immunol.* 98, 20–33.
- Chen, P. C., Cheng, H. C., Wang, J., Wang, S. W., Tai, H. C., Lin, C. W., et al. (2014). Prostate cancer-derived CCN3 induces M2 macrophage infiltration and contributes to angiogenesis in prostate cancer microenvironment. *Oncotarget* 5, 1595–1608. doi: 10.18632/oncotarget.1570.
- Cheng, Y., Si, Y., Wang, L., Ding, M., Yu, S., Lu, L., et al. (2021a). The regulation of macrophage polarization by hypoxia-PADI4 coordination in Rheumatoid arthritis. *Int. Immunopharmacol.* 99, 107988. doi: 10.1016/j.intimp.2021.107988.
- Cheng, Y., Si, Y., Wang, L., Ding, M., Yu, S., Lu, L., et al. (2021b). The regulation of macrophage polarization by hypoxia-PADI4 coordination in Rheumatoid arthritis. *Int. Immunopharmacol.* 99, 107988.
- Chiba, Y., Mizoguchi, I., Furusawa, J., Hasegawa, H., Ohashi, M., Xu, M., et al. (2018). Interleukin-27 exerts its antitumor effects by promoting differentiation of hematopoietic stem cells to M1 macrophages. *Cancer Res.* 78, 182–194.
- Cui, Y., Chen, F., Gao, J., Lei, M., Wang, D., Jin, X., et al. (2021). Comprehensive landscape of the renin-angiotensin system in Pan-cancer: a potential downstream mediated mechanism of SARS-CoV-2. *Int. J. Biol. Sci.* 17, 3795.
- Cui, Z., Feng, Y., Li, D., Li, T., Gao, P., and Xu, T. (2020). Activation of aryl hydrocarbon receptor (AhR) in mesenchymal stem cells modulates macrophage polarization in asthma. *J. Immunotoxicol.* 17, 21–30.
- Dong, H., Xie, C., Jiang, Y., Li, K., Lin, Y., Pang, X., et al. (2021). Tumor-Derived Exosomal Protein Tyrosine Phosphatase Receptor Type O Polarizes Macrophage to Suppress Breast Tumor Cell Invasion and Migration. *Front. cell Dev. Biol.*, 2731.
- Fang, X. Y., Zhan, Y. X., Zhou, X. M., Wu, L. N., Lin, J., Yi, Y. T., et al. (2021). CXCL12/CXCR4 Mediates Orthodontic Root Resorption via Regulating the M1/M2 Ratio. *J. Dent. Res.*, 00220345211050324.

- Guo, Y., Lin, C., Xu, P., Wu, S., Fu, X., Xia, W., et al. (2016). AGEs induced autophagy impairs cutaneous wound healing via stimulating macrophage polarization to M1 in diabetes. *Sci. Rep.* 6, 1–16.
- Huang, Y., Li, Q., Hu, R., Li, R., and Yang, Y. (2022). Five immune-related genes as diagnostic markers for endometriosis and their correlation with immune infiltration. *Front. Endocrinol. (Lausanne)*. 13, 1–15. doi: 10.3389/fendo.2022.1011742.
- Inoue, T. (2017). M1 macrophage triggered by Mincle leads to a deterioration of acute kidney injury. *Kidney Int.* 91, 526–529. doi: 10.1016/j.kint.2016.11.026.
- Jablonski, K. A., Gaudet, A. D., Amici, S. A., Popovich, P. G., and Guerau-de-Arellano, M. (2016). Control of the inflammatory macrophage transcriptional signature by miR-155. *PLoS One* 11, e0159724.
- Joerink, M., Rindsjö, E., Van Riel, B., Alm, J., and Papadogiannakis, N. (2011). Placental macrophage (Hofbauer cell) polarization is independent of maternal allergen-sensitization and presence of chorioamnionitis. *Placenta* 32, 380–385.
- LA, O., A, S., and JS, B. (2017). 乳鼠心肌提取 HHS Public Access. *Physiol. Behav.* 176, 139–148. doi: 10.1161/CIRCULATIONAHA.118.034165. Anti-angiogenic.
- Le, Y., Gao, H., Bleday, R., and Zhu, Z. (2018). The homeobox protein VentX reverts immune suppression in the tumor microenvironment. *Nat. Commun.* 9, 1–10.
- Liu, M., Li, F., Liu, B., Jian, Y., Zhang, D., Zhou, H., et al. (2021). Profiles of immune cell infiltration and immune-related genes in the tumor microenvironment of esophageal squamous cell carcinoma. *BMC Med. Genomics* 14, 1–11.
- Lv, D., Wu, X., Chen, X., Yang, S., Chen, W., Wang, M., et al. (2021). A novel immune-related gene-based prognostic signature to predict biochemical recurrence in patients with prostate cancer after radical prostatectomy. *Cancer Immunol. Immunother.* 70, 3587–3602.
- Müller, E., Christopoulos, P. F., Halder, S., Lunde, A., Beraki, K., Speth, M., et al. (2017). Toll-like receptor ligands and interferon- $\gamma$  synergize for induction of antitumor M1 macrophages. *Front. Immunol.* 8, 1383.
- Oliveira, L. J., McClellan, S., and Hansen, P. J. (2010). Differentiation of the endometrial macrophage during pregnancy in the cow. *PLoS One* 5, e13213.
- Pagie, S., Gérard, N., and Charreau, B. (2018). Notch signaling triggered via the ligand DLL4 impedes M2 macrophage differentiation and promotes their apoptosis. *Cell Commun. Signal.* 16, 1–12.
- Quan, Q., Xiong, X., Wu, S., and Yu, M. (2021). Identification of Immune-Related Key Genes in Ovarian Cancer Based on WGCNA. *Front. Genet.*, 2214.
- Quero, L., Tiaden, A. N., Hanser, E., Roux, J., Laski, A., Hall, J., et al. (2020). miR-221-3p Drives the Shift of M2-Macrophages to a Pro-Inflammatory Function by Suppressing JAK3/STAT3 Activation. *Front. Immunol.* 10. doi: 10.3389/fimmu.2019.03087.
- Sanjurjo, L., Aran, G., Téllez, É., Amézaga, N., Armengol, C., López, D., et al. (2018). CD5L promotes M2 macrophage polarization through autophagy-mediated upregulation of ID3. *Front. Immunol.* 9, 480.
- Sato, K., Yamashita, T., Shirai, R., Shibata, K., Okano, T., Yamaguchi, M., et al. (2018). Adropin contributes to anti-atherosclerosis by suppressing monocyte-endothelial cell adhesion and smooth muscle cell proliferation. *Int. J. Mol. Sci.* 19, 1293.
- Seneviratne, A., Cave, L., Hyde, G., Moestrup, S. K., Carling, D., Mason, J. C., et al. (2021). Metformin directly suppresses atherosclerosis in normoglycaemic mice via haematopoietic adenosine monophosphate-activated protein kinase. *Cardiovasc. Res.* 117, 1295–1308. doi: 10.1093/cvr/cvaa171.

- Shapouri-Moghaddam, A., Mohammadian, S., Vazini, H., Taghadossi, M., Esmacili, S. A., Mardani, F., et al. (2018). *Macrophage plasticity, polarization, and function in health and disease*. doi: 10.1002/jcp.26429.
- Song, W.-M., Agrawal, P., Von Itter, R., Fontanals-Cirera, B., Wang, M., Zhou, X., et al. (2021). Network models of primary melanoma microenvironments identify key melanoma regulators underlying prognosis. *Nat. Commun.* 12, 1–14.
- Talamonti, E., Pauter, A. M., Asadi, A., Fischer, A. W., Chiurchiù, V., and Jacobsson, A. (2017). Impairment of systemic DHA synthesis affects macrophage plasticity and polarization: implications for DHA supplementation during inflammation. *Cell. Mol. Life Sci.* 74, 2815–2826.
- Tan, Y., Sun, R., Liu, L., Yang, D., Xiang, Q., Li, L., et al. (2021). Tumor suppressor DRD2 facilitates M1 macrophages and restricts NF-κB signaling to trigger pyroptosis in breast cancer. *Theranostics* 11, 5214.
- van den Bossche, J., Laoui, D., Morias, Y., Movahedi, K., Raes, G., de Baetselier, P., et al. (2012). Claudin-1, Claudin-2 and Claudin-11 Genes Differentially Associate with Distinct Types of Anti-inflammatory Macrophages In vitro and with Parasite- and Tumour-elicited Macrophages In vivo. *Scand. J. Immunol.* 75, 588–598. doi: 10.1111/j.1365-3083.2012.02689.x.
- Wang, L., Liu, X., Song, X., Dong, L., and Liu, D. (2019a). MiR-202-5p promotes M2 polarization in allergic rhinitis by targeting MATN2. *Int. Arch. Allergy Immunol.* 178, 119–127.
- Wang, L., Liu, X., Song, X., Dong, L., and Liu, D. (2019b). MiR-202-5p Promotes M2 Polarization in Allergic Rhinitis by Targeting MATN2. *Int. Arch. Allergy Immunol.* 178, 119–127. doi: 10.1159/000493803.
- Wu, D., Weng, Y., Feng, Y., Liang, B., Wang, H., Li, L., et al. (2021a). Trem1 Induces Periodontal Inflammation via Regulating M1 Polarization. *J. Dent. Res.*, 00220345211044681.
- Wu, M.-F., Lin, C.-A., Yuan, T.-H., Yeh, H.-Y., Su, S.-F., Guo, C.-L., et al. (2021b). The M1/M2 spectrum and plasticity of malignant pleural effusion-macrophage in advanced lung cancer. *Cancer Immunol. Immunother.* 70, 1435–1450.
- Wu, X., Giobbie-Hurder, A., Liao, X., Connelly, C., Connolly, E. M., Li, J., et al. (2017). Angiopoietin-2 as a Biomarker and Target for Immune Checkpoint Therapy. *Cancer Immunol. Res.* 5, 17–28. doi: 10.1158/2326-6066.CIR-16-0206.
- Yan, C., Zhou, Q.-Y., Wu, J., Xu, N., Du, Y., Li, J., et al. (2021). Csi-let-7a-5p delivered by extracellular vesicles from a liver fluke activates M1-like macrophages and exacerbates biliary injuries. *Proc. Natl. Acad. Sci.* 118.
- Yan, J., Wu, X., Yu, J., Zhu, Y., and Cang, S. (2020). Prognostic Role of Tumor Mutation Burden Combined With Immune Infiltrates in Skin Cutaneous Melanoma Based on Multi-Omics Analysis. *Front. Oncol.* 10, 2403.
- Zhang, A. Z., Yuan, X., Liang, W. H., Zhang, H. J., Li, Y., Xie, Y. F., et al. (2021). Immune Infiltration in Gastric Cancer Microenvironment and Its Clinical Significance. *Front. Cell Dev. Biol.* 9.
